# Supplementary material
Source: PubMed Central journal article supplement (PMC6717677)
Supplement: NIHMS1534960-supplement-2.pdf [file NIHMS1534960-supplement-2.pdf]

## Appendices

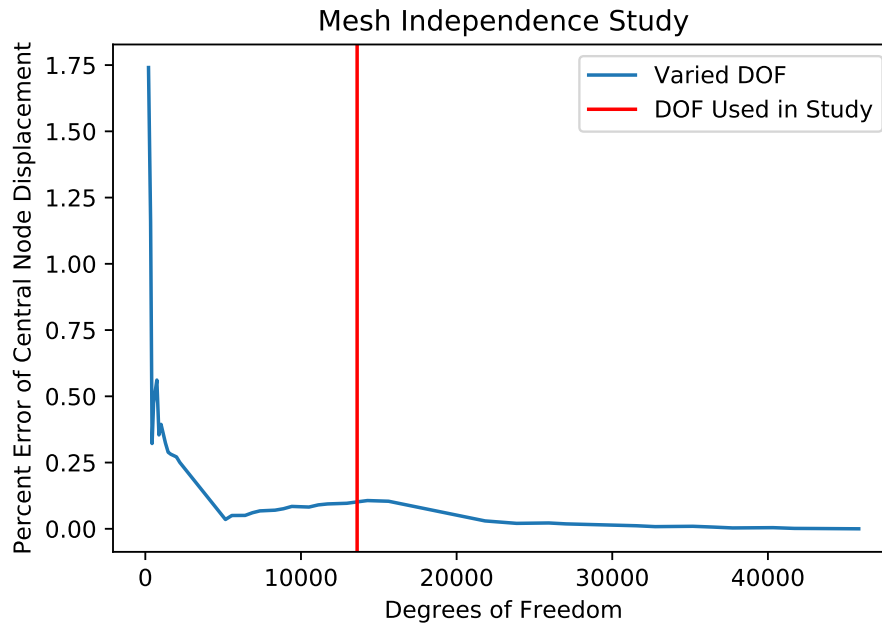

Supplementary Figure 1: An arbitrary bending deformation was simulated using meshes with varying degrees of freedom. The finest mesh (45835 degrees of freedom) was completed first and the maximum deflection of the center of the bending face was recorded ( $y_f$ ). This value was used to compute the percent error of the maximum central node deflection among the other meshes ( $y_n$ ) undergoing the same bending deformation and is computed as  $\%error = \frac{y_n - y_f}{y_f} * 100$ . There is less than 0.05 % error between the mesh size used in this study (13608 degrees of freedom) and a highly-refined and computationally expensive mesh (45835 degrees of freedom). We conclude that the mesh size used for this study is sufficiently refined.

Table 1: Stiffness Modulated Gel Formulations.

| Hydrogel Composition | 2.5 kPa  | 5 kPa    | 10 kPa   |
|----------------------|----------|----------|----------|
| 40 kDa, 8 arm PEG-Nb | 3 wt%    | 5 wt%    | 5 wt%    |
| CRGDS                | 1 mM     | 1 mM     | 1 mM     |
| MMP                  | 0.97 mM  | 3.25 mM  | 4.5 mM   |
| LAP                  | 0.05 wt% | 0.05 wt% | 0.05 wt% |
| Thiole:Ene           | 0.49:1   | 0.75:1   | 1:1      |

Table 2: CRGDS Modulated Gel Formulations.

| Hydrogel Composition | 0 mM CRGDS | 0.5 mM CRGDS | 1.0 mM CRGDS |
|----------------------|------------|--------------|--------------|
| 40 kDa, 8 arm PEG-Nb | 5 wt%      | 5 wt%        | 5 wt%        |
| CRGDS                | 0 mM       | 0.5 mM       | 1.0 mM       |
| MMP                  | 4.5 mM     | 4.5 mM       | 4.5 mM       |
| LAP                  | 0.05 wt%   | 0.05 wt%     | 0.05 wt%     |
| Thiole:Ene           | 0.90:1     | 0.95:1       | 1:1          |

Table 3: Sample information for modulus varied test specimens.

| Hydrogel Stiffness | Specimen Number | Specimen Thickness (mm) | Specimen Width (mm) | I (mm <sup>4</sup> ) | $\mu$ -Normal (kPa) | $\mu$ -Hypertensive (kPa) | $\mu$ -Non-contractile (kPa) | r <sup>2</sup> (AVG) |
|--------------------|-----------------|-------------------------|---------------------|----------------------|---------------------|---------------------------|------------------------------|----------------------|
| 2.5 kPa            | 1               | 1.18                    | 5.72                | 0.78                 | 0.79                | 0.85                      | 0.70                         | 0.97                 |
|                    | 2               | 1.39                    | 5.39                | 1.20                 | 0.41                | 0.38                      | 0.26                         | 0.86                 |
|                    | 3               | 1.86                    | 5.48                | 2.94                 | 0.22                | 0.29                      | 0.12                         | 0.91                 |
|                    | 4               | 1.50                    | 5.28                | 0.84                 | 0.66                | 0.80                      | 0.52                         | 0.90                 |
|                    | 5               | 1.24                    | 5.20                | 1.16                 | 0.33                | 0.50                      | 0.25                         | 0.98                 |
|                    | <b>Mean</b>     | 1.43                    | 5.41                | 1.38                 | 0.48                | 0.56                      | 0.37                         | 0.92                 |
|                    | <b>SEM</b>      | 0.12                    | 0.09                | 0.40                 | 0.11                | 0.11                      | 0.11                         | 0.03                 |
| 5 kPa              | 1 <sup>1</sup>  | 1.60                    | 6.20                | 2.12                 | 1.40                | 3.96                      | 0.67                         | 0.96                 |
|                    | 2               | 1.73                    | 5.95                | 2.55                 | 1.93                | 2.25                      | 1.84                         | 0.95                 |
|                    | 3               | 1.82                    | 6.31                | 3.17                 | 1.59                | 2.04                      | 1.20                         | 0.825                |
|                    | 4               | 1.41                    | 6.04                | 1.41                 | 1.38                | 1.59                      | 1.04                         | 0.99                 |
|                    | 5               | 1.05                    | 5.80                | 1.35                 | 1.80                | 1.95                      | 1.54                         | 0.92                 |
|                    | <b>Mean</b>     | 1.52                    | 6.06                | 2.12                 | 1.62                | 2.36                      | 1.26                         | 0.93                 |
|                    | <b>SEM</b>      | 0.14                    | 0.09                | 0.35                 | 0.11                | 0.46                      | 0.20                         | 0.03                 |
| 10 kPa             | 1               | 1.33                    | 5.89                | 1.15                 | 1.73                | 2.02                      | 1.69                         | 0.98                 |
|                    | 2               | 1.43                    | 5.38                | 1.31                 | 1.95                | 2.06                      | 1.82                         | 0.98                 |
|                    | 3               | 1.80                    | 6.50                | 3.16                 | 2.27                | 2.66                      | 1.74                         | 0.87                 |
|                    | 4               | 1.28                    | 5.95                | 1.04                 | 2.60                | 2.97                      | 1.84                         | 0.96                 |
|                    | 5               | 1.32                    | 5.61                | 1.07                 | 1.31                | 1.35                      | 1.31                         | 0.98                 |
|                    | <b>Mean</b>     | 1.43                    | 5.87                | 1.55                 | 1.97                | 2.21                      | 1.68                         | 0.95                 |
|                    | <b>SEM</b>      | 0.10                    | 0.19                | 0.41                 | 0.22                | 0.28                      | 0.10                         | 0.02                 |

<sup>1</sup>Outlier and not included in analysis

Table 4: Sample information for RGDS concentration modulated test specimens.

| RGDS Conc. | Specimen Number | Specimen Thickness (mm) | Specimen Width (mm) | I (mm <sup>4</sup> ) | $\mu$ -Normal (kPa) | $\mu$ -Hypertensive (kPa) | $\mu$ -Non-contractile (kPa) | r <sup>2</sup> (AVG) |
|------------|-----------------|-------------------------|---------------------|----------------------|---------------------|---------------------------|------------------------------|----------------------|
| 0 mM       | 1               | 1.10                    | 5.50                | 0.61                 | 1.98                | 1.73                      | 2.00                         | 0.95                 |
|            | 2               | 1.24                    | 5.96                | 0.95                 | 1.74                | 2.15                      | 1.76                         | 0.81                 |
|            | 3               | 1.53                    | 5.44                | 1.62                 | 0.90                | 0.96                      | 1.03                         | 0.94                 |
|            | 4               | 1.26                    | 5.46                | 0.92                 | 1.22                | 1.03                      | 1.08                         | 0.89                 |
|            | 5               | 1.43                    | 5.85                | 1.44                 | 1.58                | 1.41                      | 1.49                         | 0.95                 |
|            | <b>Mean</b>     | 1.31                    | 5.64                | 1.11                 | 1.36                | 1.39                      | 1.47                         | 0.90                 |
|            | <b>SEM</b>      | 0.08                    | 0.11                | 0.18                 | 0.17                | 0.24                      | 0.19                         | 0.03                 |
| 0.5 mM     | 1               | 1.31                    | 5.45                | 1.02                 | 2.84                | 2.79                      | 2.25                         | 0.99                 |
|            | 2               | 1.29                    | 5.70                | 1.02                 | 0.95                | 1.34                      | 1.17                         | 0.95                 |
|            | 3               | 1.32                    | 5.98                | 1.15                 | 1.45                | 1.90                      | 1.25                         | 0.98                 |
|            | 4               | 1.28                    | 5.28                | 0.92                 | 1.94                | 1.88                      | 1.21                         | 0.93                 |
|            | 5               | 1.30                    | 5.65                | 1.03                 | 2.53                | 2.90                      | 2.48                         | 0.89                 |
|            | <b>Mean</b>     | 1.30                    | 5.612               | 1.03                 | 1.94                | 2.16                      | 1.67                         | 0.95                 |
|            | <b>SEM</b>      | 0.007                   | 0.12                | 0.04                 | 0.35                | 0.30                      | 0.28                         | 0.02                 |
| 1.0 mM     | 1               | 1.33                    | 5.89                | 1.15                 | 1.73                | 2.02                      | 1.69                         | 0.98                 |
|            | 2               | 1.43                    | 5.38                | 1.31                 | 1.95                | 2.06                      | 1.82                         | 0.98                 |
|            | 3               | 1.80                    | 6.50                | 3.16                 | 2.27                | 2.66                      | 1.74                         | 0.87                 |
|            | 4               | 1.28                    | 5.95                | 1.04                 | 2.60                | 2.97                      | 1.84                         | 0.96                 |
|            | 5               | 1.32                    | 5.61                | 1.07                 | 1.31                | 1.35                      | 1.31                         | 0.98                 |
|            | <b>Mean</b>     | 1.43                    | 5.87                | 1.55                 | 1.97                | 2.21                      | 1.68                         | 0.95                 |
|            | <b>SEM</b>      | 0.10                    | 0.19                | 0.41                 | 0.22                | 0.28                      | 0.10                         | 0.02                 |
